# Supplementary material
Source: publisher site journal article supplement (https://www.dovepress.com/get_supplementary_file.php?f=490269.docx)
Supplement: Supplementary file 1 [file get_supplementary_file.php]

**Questionnaire**

**Section 1 Demographic characteristics**

1. Your age: (Years).
2. Your gender: 1 Male. 2 Female.
3. Your education level:

1 High school or below. 2 College. 3 postgraduate or above.

1. Have you ever suffered from any systemic diseases? (including cardiovascular, autoimmune, infectious, blood system, endocrine, mental and psychological diseases )

0 No. 1 Yes.

1. Do you have a history of dental treatment?

0 No. 1 Yes.

**Section 2 Oral behaviors checklist**

| Activities During Sleep | None of the time | ＜1 Night/Month | 1-3 Nights/Month | 1-3 Nights/Week | 4-7 Nights/Week |
| --- | --- | --- | --- | --- | --- |
| 1. Bruxism in sleep: Clench or grind teeth when asleep, based on any information you may have | □ | □ | □ | □ | □ |
| 1. Sleep Posture pressuring jaw: Sleep in a position that puts pressure on the jaw (for example, on stomach, on the side) | □ | □ | □ | □ | □ |
| Activities During Waking Hours | None of the time | A little of the time | Some of the time | Most of the time | All of the time |
| 1. Bruxism in awake: Grind teeth together during waking hours | □ | □ | □ | □ | □ |
| 1. Clench teeth together during waking hours | □ | □ | □ | □ | □ |
| 1. Press, touch, or hold teeth together other than while eating (that is, contact between upper and lower teeth) | □ | □ | □ | □ | □ |
| 1. Hold, tighten, or tense muscles without clenching or bringing teeth together | □ | □ | □ | □ | □ |
| 1. Hold or jut jaw forward or to the side | □ | □ | □ | □ | □ |
| 1. Hold jaw in rigid or tense position, such as to brace or protect the jaw | □ | □ | □ | □ | □ |

**Section 3** is the 5 major TMD symptoms (5Ts) questionnaire, the 5 major TMD symptoms(5Ts) were chosen as a TMD screening tool in pervious study. (Yap AU, Cao Y, Zhang MJ, Lei J, Fu KY. Number and type of temporomandibular disorder symptoms: their associations with psychological distress and oral health-related quality of life. Oral surgery, oral medicine, oral pathology and oral radiology. 2021 Sep;132(3):288-296. doi: 10.1016/j.oooo.2021.04.059.)

SI Table 1. Proportions of oral behaviors among different groups of symptoms

| **Variable** | **NS(%)** | **1S(%)** | **2S(%)** | **3S(%)** | **4S(%)** | **5S(%)** |
| --- | --- | --- | --- | --- | --- | --- |
| **No Oral Behavior** | 75.1 | 47.1 | 44.6 | 40.9 | 32 | 76.5 |
| **Bruxism in awake** | 8 | 2 | 1.4 | .0 | 4 | 0 |
| **Teeth clenching** | 8 | 3.9 | 5.4 | 0 | 8 | 0 |
| **holding jaw in rigid or tense position** | 0 | 2.9 | 6.8 | 0 | 8 | 5.9 |
| **holding jaw forward or to the side** | 0 | 1 | 4.1 | 6.8 | 8 | 0 |
| **holding or tightening muscles without clenching** | 8 | 3.9 | 4.1 | 2.3 | 8 | 0 |
| **Bruxism in sleep** | 4.8 | 5.9 | 5.4 | 9.1 | 8 | 2.9 |
| **Sleep Posture pressuring jaw** | 13.6 | 22.5 | 18.9 | 25 | 12 | 14.7 |
| **pressing, holding or touch teeth together** | 4 | 10.8 | 9.5 | 15.9 | 12 | 0 |

**Notes:** NS: no symptom. 1S:1 symptom. 2S: 2 symptoms. 3S: 3 symptoms. 4S: 4 symptoms. 5S: 5 symptoms.

SI Table 2. Spearman correlation P value

| **Variable** | **Num of Symptom (Total)** | **Num of Symptom (Female)** | **Num of Symptom (Male)** |
| --- | --- | --- | --- |
| **Bruxism in sleep** | <0.001*** | 0.004** | 0.043* |
| **Sleep Posture pressuring jaw** | <0.001*** | <0.001*** | 0.006** |
| **Bruxism in awake** | <0.001*** | <0.001*** | 0.034* |
| **Teeth clenching** | <0.001*** | <0.001*** | 0.004** |
| **pressing, holding or touch teeth together** | <0.001*** | <0.001*** | <0.001*** |
| **holding or tightening muscles without clenching** | <0.001*** | <0.001*** | 0.001** |
| **holding jaw forward or to the side** | <0.001*** | <0.001*** | <0.001*** |
| **holding jaw in rigid or tense position** | <0.001*** | <0.001*** | <0.001*** |
| **Sleep OB** | <0.001*** | <0.001*** | 0.010* |
| **Wake OB** | <0.001*** | <0.001*** | <0.001*** |
| **OBC-8** | <0.001*** | <0.001*** | <0.001*** |
